# Supplementary material for: P-Cadherin Regulates Intestinal Epithelial Cell Migration and Mucosal Repair, but Is Dispensable for Colitis Associated Colon Cancer
Source: MDPI journal article supplement (doi:10.3390/cells11091467), 2022-04-27
Supplement: s1 [file s1]

**Table S2. Top 30 downregulated genes in P-cadherin knockout HCA-7 cells**

| GeneID | Symbol   | logFC | logCPM | F       | P-Value  |
|--------|----------|-------|--------|---------|----------|
| 860    | RUNX2    | -4.37 | 3.66   | 1213.69 | 1.58E-17 |
| 10371  | SEMA3A   | -3.98 | 4.18   | 1591.38 | 1.54E-18 |
| 56062  | KLHL4    | -3.89 | -0.65  | 163.47  | 2.85E-10 |
| 4069   | LYZ      | -3.78 | 7.38   | 2686.21 | 1.69E-20 |
| 10235  | RASGRP2  | -3.69 | 0.97   | 189.99  | 1.02E-10 |
| 126    | ADH1C    | -2.84 | 1.95   | 404.98  | 1.75E-13 |
| 2045   | EPHA7    | -2.60 | 2.39   | 585.78  | 7.84E-15 |
| 414332 | LCN10    | -2.48 | 1.31   | 174.63  | 1.69E-10 |
| 3075   | CFH      | -2.48 | 0.41   | 151.00  | 5.32E-10 |
| 283078 | MKX      | -2.46 | 4.29   | 799.04  | 5.63E-16 |
| 92747  | BPIFB1   | -2.41 | 2.87   | 334.92  | 8.47E-13 |
| 79365  | BHLHE41  | -2.11 | 1.84   | 251.37  | 8.97E-12 |
| 57212  | TP73-AS1 | -2.09 | 2.43   | 236.42  | 1.48E-11 |
| 53405  | CLIC5    | -2.03 | 1.92   | 208.00  | 4.17E-11 |
| 4582   | MUC1     | -1.95 | 4.38   | 447.33  | 7.59E-14 |
| 5801   | PTPRR    | -1.67 | 4.29   | 448.33  | 7.45E-14 |
| 5918   | RARRES1  | -1.57 | 3.29   | 245.17  | 1.10E-11 |
| 55130  | ODAD2    | -1.50 | 2.67   | 219.99  | 2.65E-11 |
| 3908   | LAMA2    | -1.48 | 2.72   | 259.79  | 6.86E-12 |
| 10008  | KCNE3    | -1.47 | 2.88   | 203.63  | 4.94E-11 |
| 93663  | ARHGAP18 | -1.45 | 8.94   | 575.30  | 9.13E-15 |
| 144100 | PLEKHA7  | -1.36 | 5.02   | 479.84  | 4.21E-14 |
| 1601   | DAB2     | -1.33 | 3.12   | 150.03  | 5.60E-10 |
| 3248   | HPGD     | -1.32 | 2.59   | 154.68  | 4.40E-10 |
| 23657  | SLC7A11  | -1.30 | 6.08   | 288.69  | 2.89E-12 |
| 27121  | DKK4     | -1.28 | 3.51   | 143.98  | 7.72E-10 |
| 10863  | ADAM28   | -1.12 | 3.49   | 172.31  | 1.88E-10 |
| 4047   | LSS      | -1.10 | 6.99   | 184.71  | 1.22E-10 |
| 23362  | PSD3     | -1.07 | 4.78   | 220.49  | 2.60E-11 |
| 346389 | MACC1    | -1.04 | 5.82   | 208.36  | 4.11E-11 |
