# Supplementary material for: P-Cadherin Regulates Intestinal Epithelial Cell Migration and Mucosal Repair, but Is Dispensable for Colitis Associated Colon Cancer
Source: MDPI journal article supplement (doi:10.3390/cells11091467), 2022-04-27
Supplement: s1 [file s1]

**Table S1. Top 30 upregulated genes in P-cadherin knockout HCA-7 cells**

| <b>GeneID</b> | <b>Symbol</b> | <b>logFC</b> | <b>logCPM</b> | <b>F</b> | <b>P-Value</b> |
|---------------|---------------|--------------|---------------|----------|----------------|
| 100505920     | LINC02036     | 10.37        | 1.58          | 702.72   | 1.29E-13       |
| 503639        | DUXAP10       | 7.34         | 1.41          | 493.39   | 3.33E-14       |
| 357           | SHROOM2       | 6.31         | 1.53          | 501.02   | 2.93E-14       |
| 503637        | DUXAP8        | 5.86         | 1.70          | 763.59   | 8.28E-16       |
| 9215          | LARGE1        | 5.78         | 3.27          | 947.20   | 1.32E-16       |
| 84433         | CARD11        | 5.70         | 1.38          | 433.72   | 9.84E-14       |
| 23158         | TBC1D9        | 5.54         | 2.33          | 520.80   | 2.24E-14       |
| 4753          | NELL2         | 4.74         | 4.07          | 1768.39  | 6.22E-19       |
| 25758         | KIAA1549L     | 4.59         | 4.93          | 815.95   | 1.16E-13       |
| 4008          | LMO7          | 4.45         | 8.46          | 4964.30  | 8.33E-23       |
| 655           | BMP7          | 4.05         | 3.46          | 897.73   | 2.08E-16       |
| 644150        | WIPF3         | 4.01         | 2.41          | 511.69   | 2.45E-14       |
| 2786          | GNG4          | 3.76         | 2.48          | 410.31   | 1.56E-13       |
| 10439         | OLFM1         | 3.71         | 3.64          | 678.58   | 2.26E-15       |
| 10000         | AKT3          | 3.62         | 5.50          | 2175.66  | 1.04E-19       |
| 130367        | SGPP2         | 3.54         | 5.98          | 1786.38  | 5.70E-19       |
| 80114         | BICC1         | 3.32         | 4.31          | 1579.86  | 1.64E-18       |
| 23302         | WSCD1         | 2.91         | 3.01          | 441.37   | 8.50E-14       |
| 2009          | EML1          | 2.44         | 4.54          | 662.67   | 2.76E-15       |
| 10810         | WASF3         | 2.37         | 3.75          | 477.96   | 4.36E-14       |
| 10076         | PTPRU         | 2.34         | 5.43          | 612.75   | 5.36E-15       |
| 58528         | RRAGD         | 1.90         | 5.00          | 527.02   | 1.91E-14       |
| 54491         | OTULINL       | 1.89         | 3.86          | 498.34   | 3.07E-14       |
| 5924          | RASGRF2       | 1.82         | 4.98          | 454.26   | 6.67E-14       |
| 9619          | ABCG1         | 1.80         | 4.52          | 547.22   | 1.39E-14       |
| 7128          | TNFAIP3       | 1.75         | 5.91          | 728.12   | 1.24E-15       |
| 3934          | LCN2          | 1.70         | 7.65          | 784.76   | 6.56E-16       |
| 22998         | LIMCH1        | 1.62         | 3.88          | 440.86   | 8.58E-14       |
| 6648          | SOD2          | 1.37         | 8.16          | 610.78   | 5.51E-15       |
| 2004          | ELK3          | 1.05         | 7.80          | 399.94   | 1.94E-13       |
